# Supplementary material for: Competing and directing interactions in new phosphoramide/thiophosphoramide structures: energy considerations and evidence for CH⋯HC contacts and aliphatic–aromatic stacking
Source: Royal Society of Chemistry journal article supplement (doi:10.1039/d3ce00204g), 2023-01-01
Supplement: d3ce00204g1.pdf [file d3ce00204g1.pdf]

## Supporting Information

# Competing and directing interactions in new phosphoramidate/thiophosphoramidate structures: energy considerations and evidence for CH...HC contacts and aliphatic-aromatic stacking

Saeed Hosseinpoor,<sup>a</sup> Mehrdad Pourayoubi,<sup>†a</sup> Mozghan Abrishami,<sup>b</sup> Marjan Sobati,<sup>b</sup> Fatemeh Karimi Ahmadabad,<sup>a</sup> Fahimeh Sabbaghi,<sup>c</sup> Marek Nečas,<sup>d</sup> Michal Dušek,<sup>e</sup> Monika Kučeráková<sup>e</sup> and Manpreet Kaur<sup>f</sup>

<sup>a</sup>Department of Chemistry, Faculty of Science, Ferdowsi University of Mashhad, Mashhad, Iran

<sup>b</sup>Department of Chemistry, Payame Noor University, 19395-4697 Tehran, Iran

<sup>c</sup>Department of Chemistry, Zanjan Branch, Islamic Azad University, Zanjan, Iran

<sup>d</sup>Department of Chemistry, Masaryk University, Kotlarska 2, Brno, 61137, Czech Republic

<sup>e</sup>Institute of Physics of the Czech Academy of Sciences, Na Slovance 2, 182 21 Prague 8, Czech Republic

<sup>f</sup>Department of Chemistry, Keene State College, Keene, NH, USA

---

<sup>†</sup>Correspondence e-mail: pourayoubi@um.ac.ir

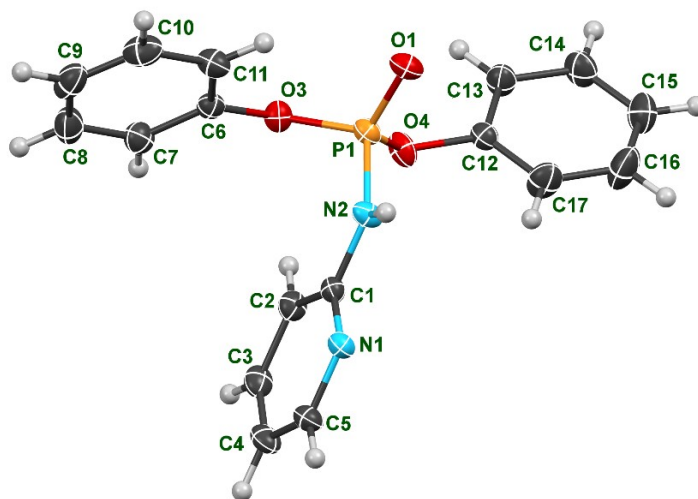

**Fig. S1** The molecular structure and atom-labeling scheme for I. Displacement ellipsoids are drawn at the 50% probability level.

**Table S1** Selected geometric parameters of structure I (Å, °).

|          |             |           |             |
|----------|-------------|-----------|-------------|
| P1—O1    | 1.4618 (10) | O3—C6     | 1.4031 (15) |
| P1—O3    | 1.5808 (10) | O4—C12    | 1.4054 (15) |
| P1—O4    | 1.5843 (10) | N1—C1     | 1.3331 (17) |
| P1—N2    | 1.6327 (12) | N2—C1     | 1.4039 (15) |
| O1—P1—O3 | 117.56 (6)  | O4—P1—N2  | 109.17 (6)  |
| O1—P1—O4 | 115.37 (5)  | C6—O3—P1  | 124.68 (9)  |
| O1—P1—N2 | 110.96 (6)  | C12—O4—P1 | 121.68 (8)  |
| O3—P1—O4 | 94.55 (5)   | C1—N2—P1  | 129.39 (9)  |
| O3—P1—N2 | 107.96 (6)  | N1—C1—N2  | 114.18 (11) |

**Table S2** Hydrogen-bond geometry of structure I (Å, °).

| <i>D</i> —H··· <i>A</i>     | <i>D</i> —H | H··· <i>A</i> | <i>D</i> ··· <i>A</i> | <i>D</i> —H··· <i>A</i> |
|-----------------------------|-------------|---------------|-----------------------|-------------------------|
| N2—H2···N1 <sup>i</sup>     | 0.84 (2)    | 2.08 (2)      | 2.9229 (16)           | 174.7 (18)              |
| C5—H5···O1 <sup>i</sup>     | 0.95        | 2.53          | 3.3365 (19)           | 142                     |
| C10—H10···O1 <sup>ii</sup>  | 0.95        | 2.55          | 3.4416 (18)           | 156                     |
| C11—H11···O1                | 0.95        | 2.63          | 3.2819 (18)           | 126                     |
| C13—H13···O1 <sup>iii</sup> | 0.95        | 2.77          | 3.3965 (18)           | 124                     |

Symmetry codes: (i)  $-x+1, -y+2, -z$ ; (ii)  $-x+2, -y+1, -z$ ; (iii)  $-x+2, -y+1, -z+1$ .

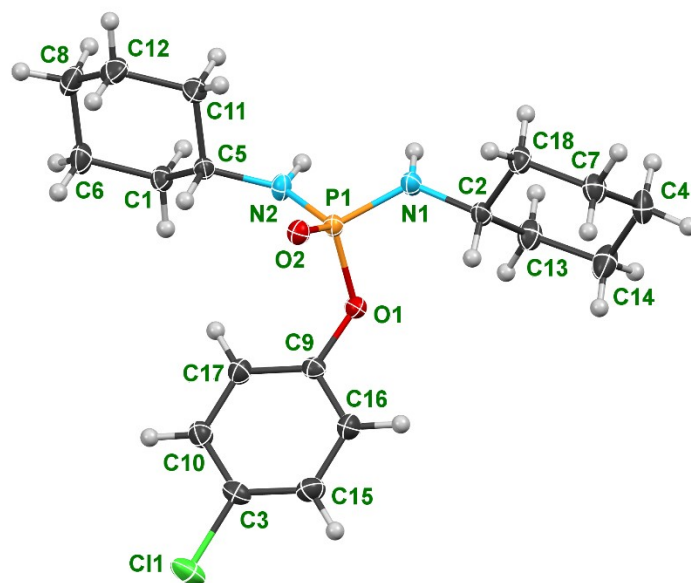

**Fig. S2** The molecular structure and atom-labeling scheme for II. Displacement ellipsoids are drawn at the 50% probability level.

**Table S3** Selected geometric parameters of structure II (Å, °).

|          |             |          |             |
|----------|-------------|----------|-------------|
| P1—O2    | 1.4785 (11) | O1—C9    | 1.3839 (18) |
| P1—N1    | 1.6219 (13) | N1—C2    | 1.4700 (18) |
| P1—N2    | 1.6254 (12) | N2—C5    | 1.4658 (19) |
| O2—P1—N1 | 119.63 (6)  | P1—N1—C2 | 124.16 (10) |
| O2—P1—N2 | 113.41 (6)  | P1—N2—C5 | 124.94 (10) |
| N1—P1—N2 | 104.60 (6)  |          |             |

**Table S4** Hydrogen-bond geometry of structure II (Å, °).

| <i>D</i> —H $\cdots$ <i>A</i>    | <i>D</i> —H | H $\cdots$ <i>A</i> | <i>D</i> $\cdots$ <i>A</i> | <i>D</i> —H $\cdots$ <i>A</i> |
|----------------------------------|-------------|---------------------|----------------------------|-------------------------------|
| N2—H1n2 $\cdots$ O2 <sup>i</sup> | 0.86 (2)    | 2.08 (2)            | 2.8878 (17)                | 157.1 (16)                    |
| N1—H1n1 $\cdots$ O2 <sup>i</sup> | 0.86 (2)    | 2.180 (18)          | 2.9812 (15)                | 154.7 (17)                    |

Symmetry code: (i)  $x, -y+5/2, z+1/2$ .

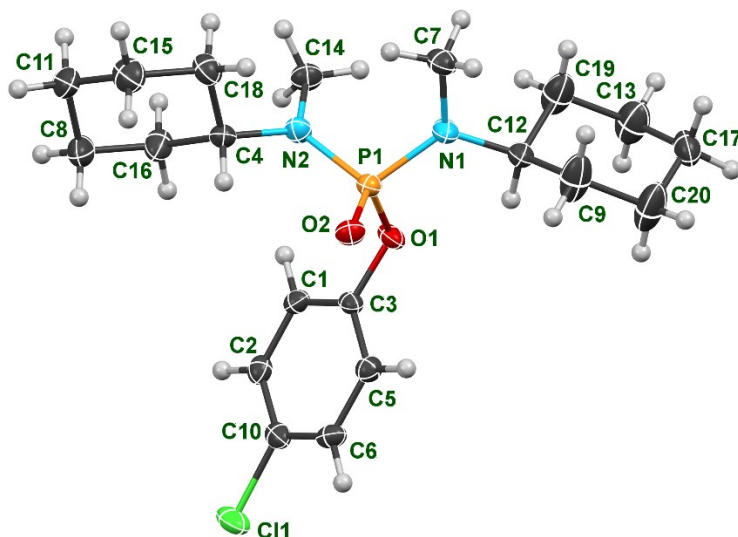

**Fig. S3** The molecular structure and atom-labeling scheme for III. Displacement ellipsoids are drawn at the 50% probability level.

**Table S5** Selected geometric parameters of structure III (Å, °).

|           |             |           |             |
|-----------|-------------|-----------|-------------|
| P1—O2     | 1.4701 (18) | N2—C4     | 1.477 (3)   |
| P1—N2     | 1.629 (2)   | N2—C14    | 1.465 (3)   |
| P1—N1     | 1.640 (2)   | N1—C7     | 1.459 (3)   |
| O1—C3     | 1.392 (3)   | N1—C12    | 1.474 (3)   |
| O2—P1—N2  | 111.22 (10) | C4—N2—C14 | 118.00 (19) |
| O2—P1—N1  | 120.01 (10) | P1—N1—C7  | 117.32 (17) |
| N2—P1—N1  | 106.27 (11) | P1—N1—C12 | 124.38 (16) |
| P1—N2—C4  | 122.13 (16) | C7—N1—C12 | 116.97 (19) |
| P1—N2—C14 | 119.62 (17) |           |             |

**Table S6** Hydrogen-bond geometry of structure III (Å, °).

| <i>D</i> —H··· <i>A</i>   | <i>D</i> —H | H··· <i>A</i> | <i>D</i> ··· <i>A</i> | <i>D</i> —H··· <i>A</i> |
|---------------------------|-------------|---------------|-----------------------|-------------------------|
| C1—H1c1···O2 <sup>i</sup> | 0.96        | 2.30          | 3.243 (3)             | 166.36                  |
| C4—H1c4···O2              | 0.96        | 2.42          | 2.953 (3)             | 114.55                  |
| C12—H1c12···O1            | 0.96        | 2.22          | 2.807 (3)             | 118.83                  |

Symmetry code: (i)  $x-1, y, z$ .

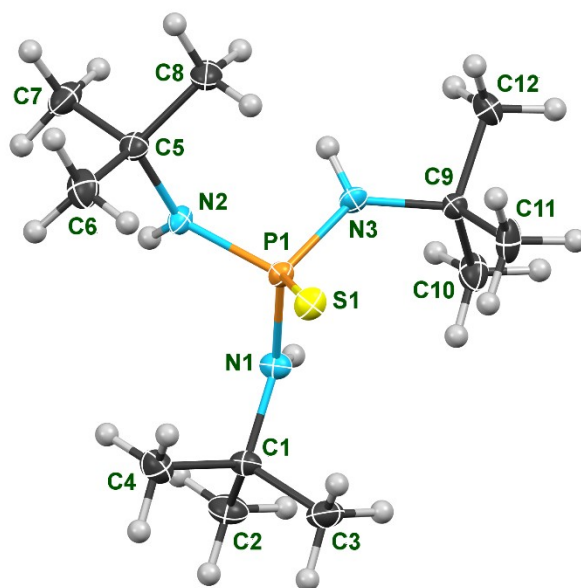

**Fig. S4** The molecular structure and atom-labeling scheme for IV. Displacement ellipsoids are drawn at the 50% probability level.

**Table S7** Selected geometric parameters of structure IV (Å, °).

|          |             |          |             |
|----------|-------------|----------|-------------|
| S1—P1    | 1.9535 (10) | N1—C1    | 1.489 (4)   |
| P1—N1    | 1.649 (3)   | N2—C5    | 1.489 (4)   |
| P1—N3    | 1.657 (3)   | N3—C9    | 1.483 (5)   |
| P1—N2    | 1.660 (3)   |          |             |
| N1—P1—N3 | 106.41 (14) | N2—P1—S1 | 115.89 (10) |
| N1—P1—N2 | 103.89 (14) | C1—N1—P1 | 130.7 (2)   |
| N3—P1—N2 | 100.31 (14) | C5—N2—P1 | 129.1 (2)   |
| N1—P1—S1 | 114.16 (11) | C9—N3—P1 | 131.0 (2)   |
| N3—P1—S1 | 114.64 (10) |          |             |

**Table S8** Hydrogen-bond geometry (Å, °)

| <i>D</i> — <i>H</i> ⋯ <i>A</i> | <i>D</i> — <i>H</i> | <i>H</i> ⋯ <i>A</i> | <i>D</i> ⋯ <i>A</i> | <i>D</i> — <i>H</i> ⋯ <i>A</i> |
|--------------------------------|---------------------|---------------------|---------------------|--------------------------------|
| N1—H1A⋯S1 <sup>i</sup>         | 0.88                | 2.89                | 3.692 (3)           | 152                            |

Symmetry code: (i)  $x-1/2, -y+1/2, z$ .

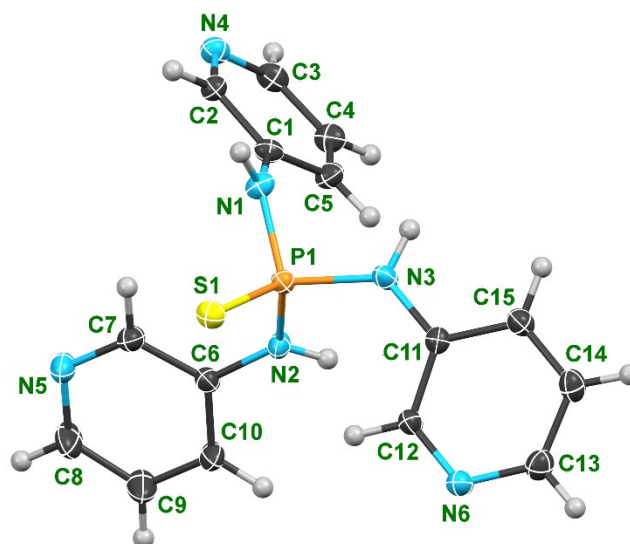

**Fig. S5** The molecular structure and atom-labeling scheme for V. Displacement ellipsoids are drawn at the 50% probability level.

**Table S9** Selected geometric parameters of structure V (Å, °).

|          |             |           |             |
|----------|-------------|-----------|-------------|
| S1—P1    | 1.9331 (9)  | N1—C1     | 1.410 (3)   |
| P1—N2    | 1.652 (2)   | N2—C6     | 1.404 (3)   |
| P1—N1    | 1.655 (2)   | N3—C11    | 1.403 (3)   |
| P1—N3    | 1.660 (2)   |           |             |
| N2—P1—N1 | 109.18 (10) | N3—P1—S1  | 118.17 (8)  |
| N2—P1—N3 | 101.02 (11) | C1—N1—P1  | 128.41 (16) |
| N1—P1—N3 | 103.02 (11) | C6—N2—P1  | 126.97 (17) |
| N2—P1—S1 | 114.22 (9)  | C11—N3—P1 | 128.05 (18) |
| N1—P1—S1 | 110.25 (8)  |           |             |

**Table S10** Hydrogen-bond geometry of structure V (Å, °).

| <i>D</i> —H $\cdots$ <i>A</i>     | <i>D</i> —H | H $\cdots$ <i>A</i> | <i>D</i> $\cdots$ <i>A</i> | <i>D</i> —H $\cdots$ <i>A</i> |
|-----------------------------------|-------------|---------------------|----------------------------|-------------------------------|
| N1—H1A $\cdots$ N4 <sup>i</sup>   | 0.88        | 2.17                | 3.038 (3)                  | 167.0                         |
| N2—H2A $\cdots$ N6 <sup>ii</sup>  | 0.88        | 2.03                | 2.888 (3)                  | 164.7                         |
| N3—H3A $\cdots$ N5 <sup>iii</sup> | 0.88        | 1.96                | 2.838 (3)                  | 173.5                         |

Symmetry codes: (i)  $x-1/2, -y+3/2, z$ ; (ii)  $x+1/2, -y+1/2, z$ ; (iii)  $-x+1, -y+1, z+1/2$ .

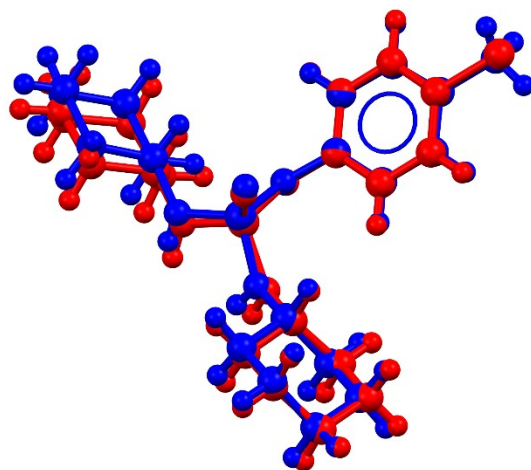

**Fig. S6** The molecular overlay of II and EVOSUE.

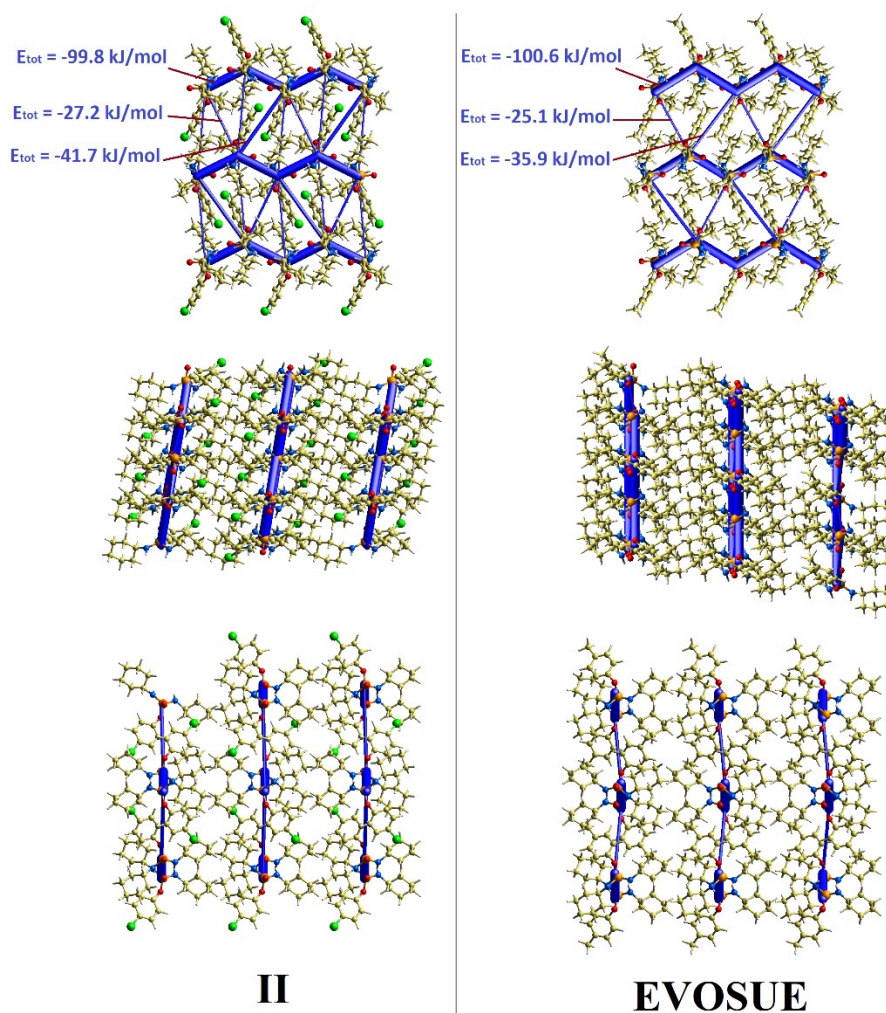

**Fig. S7** Comparison of the packing maps and energy frameworks of structures II and EVOSUE (energy cutoff =  $-20 \text{ kJ/mol}$ ).

**Table S11** The interaction energies for the different molecular pairs in structure I (energy values are in kJ/mole).  $R$  is the distance between molecular centroids (Å).

| $N$                          | Symmetry operations | $R$   | $E_{\text{ele}}$ | $E_{\text{pol}}$ | $E_{\text{dis}}$ | $E_{\text{rep}}$ | $E_{\text{tot}}$ |
|------------------------------|---------------------|-------|------------------|------------------|------------------|------------------|------------------|
| 1                            | $-x, -y, -z$        | 11.68 | -2.9             | -0.4             | -9.6             | 5.7              | -8.2             |
| 2                            | $x, y, z$           | 9.01  | -5.4             | -3               | -20.6            | 12.7             | -18              |
| 2                            | $x, y, z$           | 10.41 | -0.5             | -0.4             | -8.6             | 3.6              | -6.1             |
| 1                            | $-x, -y, -z$        | 9.17  | -8.8             | -1.4             | -51.5            | 38.8             | -31.2            |
| 2                            | $x, y, z$           | 10.02 | -2.7             | -0.6             | -15.1            | 10.6             | -9.9             |
| 1                            | $-x, -y, -z$        | 6.47  | -100.9           | -20              | -36.1            | 119.3            | -79.2            |
| 2                            | $x, y, z$           | 10.47 | 0.3              | -0.2             | -9               | 3.4              | -5.5             |
| 1                            | $-x, -y, -z$        | 5.04  | -17.8            | -2.7             | -54.7            | 32.2             | -48.5            |
| 1                            | $-x, -y, -z$        | 8.56  | -9.2             | -0.8             | -42              | 29.3             | -28.9            |
| 1                            | $-x, -y, -z$        | 8.89  | -14.3            | -5.2             | -15.6            | 15.6             | -22.9            |
| 1                            | $-x, -y, -z$        | 7.93  | -15.8            | -5.4             | -38              | 29.1             | -35.8            |
| 1                            | $-x, -y, -z$        | 13.56 | -1.9             | -0.3             | -5.2             | 1                | -6.2             |
| $\sum \frac{1}{2} E \cdot N$ |                     |       | <b>-94.1</b>     | <b>-22.3</b>     | <b>-179.65</b>   | <b>165.8</b>     | <b>-169.95</b>   |



**Table S12** The interaction energies for the different molecular pairs in structure II (energy values are in kJ/mole).  $R$  is the distance between molecular centroids (Å).

| $N$                          | Symmetry operations | $R$   | $E_{\text{ele}}$ | $E_{\text{pol}}$ | $E_{\text{dis}}$ | $E_{\text{rep}}$ | $E_{\text{tot}}$ |
|------------------------------|---------------------|-------|------------------|------------------|------------------|------------------|------------------|
| 1                            | $-x, -y, -z$        | 14.83 | 0                | -0.1             | -4               | 0.3              | -3.3             |
| 2                            | $x, -y+1/2, z+1/2$  | 11.97 | -0.1             | -0.2             | -8.6             | 2.6              | -6.2             |
| 2                            | $x, y, z$           | 11.27 | -3.1             | -0.5             | -28.1            | 17.3             | -17.4            |
| 2                            | $x, -y+1/2, z+1/2$  | 13.27 | -0.4             | -0.1             | -10.2            | 3.8              | -7               |
| 2                            | $x, -y+1/2, z+1/2$  | 5.73  | -67.1            | -22.7            | -75.4            | 86.9             | -99.8            |
| 1                            | $-x, -y, -z$        | 7.52  | -19.3            | -6.9             | -46.8            | 39.7             | -41.7            |
| 2                            | $-x, y+1/2, -z+1/2$ | 9.58  | -5.4             | -1.1             | -29.6            | 18.9             | -20.7            |
| 1                            | $-x, -y, -z$        | 7.45  | -8.2             | -1               | -37.4            | 24               | -27.2            |
| 2                            | $-x, y+1/2, -z+1/2$ | 14.05 | -2.7             | -0.4             | -7.2             | 7.5              | -4.7             |
| $\sum \frac{1}{2} E \cdot N$ |                     |       | <b>-92.55</b>    | <b>-29</b>       | <b>-203.2</b>    | <b>169</b>       | <b>-191.9</b>    |

**Table S13** The interaction energies for the different molecular pairs in structure III (energy values are in kJ/mole).  $R$  is the distance between molecular centroids (Å).

| $N$                          | Symmetry operations | $R$   | $E_{\text{ele}}$ | $E_{\text{pol}}$ | $E_{\text{dis}}$ | $E_{\text{rep}}$ | $E_{\text{tot}}$ |
|------------------------------|---------------------|-------|------------------|------------------|------------------|------------------|------------------|
| 2                            | $-x, y+1/2, -z+1/2$ | 9.26  | -7.8             | 0                | -44.7            | 26.8             | -30.5            |
| 1                            | $-x, -y, -z$        | 13.17 | -0.7             | -0.1             | -6               | 0.6              | -5.6             |
| 2                            | $x, y, z$           | 6.05  | -23.4            | -10.5            | -55.1            | 45.5             | -52.4            |
| 2                            | $x, -y+1/2, z+1/2$  | 11.18 | -4.2             | -0.8             | -28.9            | 18.9             | -18.5            |
| 2                            | $x, -y+1/2, z+1/2$  | 9.73  | -6.9             | -2.1             | -42.2            | 23.3             | -31.2            |
| 2                            | $-x, y+1/2, -z+1/2$ | 9.83  | -3               | -0.3             | -23.7            | 11.5             | -16.9            |
| 1                            | $-x, -y, -z$        | 14.78 | -2.5             | -0.2             | -4.1             | 12.5             | 1.4              |
| $\sum \frac{1}{2} E \cdot N$ |                     |       | <b>-46.9</b>     | <b>-13.85</b>    | <b>-199.65</b>   | <b>132.55</b>    | <b>-151.6</b>    |

**Table S14** The interaction energies for the different molecular pairs in structure IV (energy values are in kJ/mole).  $R$  is the distance between molecular centroids (Å).

| $N$                          | Symmetry operations    | $R$   | $E_{\text{ele}}$ | $E_{\text{pol}}$ | $E_{\text{dis}}$ | $E_{\text{rep}}$ | $E_{\text{tot}}$ |
|------------------------------|------------------------|-------|------------------|------------------|------------------|------------------|------------------|
| 2                            | $x+1/2, -y+1/2, z$     | 9.56  | -3.1             | -1.4             | -12.8            | 8.4              | -10.3            |
| 2                            | $-x, -y, z+1/2$        | 8.83  | -2.4             | -0.4             | -17.3            | 7.3              | -13.4            |
| 2                            | $x+1/2, -y+1/2, z$     | 5.9   | -17.7            | -6.1             | -53.8            | 40.8             | -44.9            |
| 2                            | $-x, -y, z+1/2$        | 10.70 | -0.5             | -0.1             | -10              | 5.2              | -6.1             |
| 2                            | $x, y, z$              | 9.65  | -0.5             | -0.4             | -14.9            | 8.5              | -8.5             |
| 2                            | $-x+1/2, y+1/2, z+1/2$ | 9.22  | -4.4             | -0.7             | -17.1            | 8.1              | -15.1            |
| 2                            | $-x+1/2, y+1/2, z+1/2$ | 9.22  | -5               | -1               | -18.8            | 9.9              | -16.3            |
| $\sum \frac{1}{2} E \cdot N$ |                        |       | <b>-33.6</b>     | <b>-10.1</b>     | <b>-144.7</b>    | <b>88.2</b>      | <b>-114.6</b>    |

**Table S15** The interaction energies for the different molecular pairs in structure V (energy values are in kJ/mole).  $R$  is the distance between molecular centroids (Å).

| $N$                          | Symmetry operations    | $R$   | $E_{\text{ele}}$ | $E_{\text{pol}}$ | $E_{\text{dis}}$ | $E_{\text{rep}}$ | $E_{\text{tot}}$ |
|------------------------------|------------------------|-------|------------------|------------------|------------------|------------------|------------------|
| 2                            | $x+1/2, -y+1/2, z$     | 6.6   | -58              | -16              | -51.5            | 85.6             | -65.2            |
| 2                            | $-x+1/2, y+1/2, z+1/2$ | 10.01 | 3.4              | -1.3             | -9               | 1.6              | -4.3             |
| 2                            | $-x, -y, z+1/2$        | 10.86 | -4.7             | -1.1             | -6.5             | 7.4              | -6.9             |
| 2                            | $x, y, z$              | 9.45  | -4               | -3.4             | -22.6            | 23.3             | -11.9            |
| 2                            | $-x, -y, z+1/2$        | 7.62  | -66.1            | -17.3            | -38.8            | 89.1             | -61.6            |
| 2                            | $-x+1/2, y+1/2, z+1/2$ | 10.01 | -1.7             | -0.9             | -6.6             | 1.3              | -7.4             |
| 2                            | $-x+1/2, y+1/2, z+1/2$ | 11.39 | -2               | -0.8             | -13.7            | 15.8             | -4.8             |
| 2                            | $x+1/2, -y+1/2, z$     | 8.86  | -40.4            | -9.6             | -18.7            | 43.5             | -39.2            |
| $\sum \frac{1}{2} E \cdot N$ |                        |       | <b>-173.5</b>    | <b>-50.4</b>     | <b>-167.4</b>    | <b>267.6</b>     | <b>-201.3</b>    |

**Table S16** Topological parameters and estimated energies ( $E_{\text{Esp}}$ ) for dihydrogen interactions in the different pairs of structures I–IV with normalized/non-normalized hydrogen atoms position ( $N/NN$ ) at the basis set 6-311G(d,p). The codes indicate the interactions shown in Fig. S8.

| pair | code      | ( $N/NN$ ) | $\rho(r)$ ( $e/\text{\AA}^3$ ) | $\nabla^2\rho(r)$ ( $e/\text{\AA}^5$ ) | $G(r)$  | $V(r)$  | $E_{\text{Esp}}$ (kJ/mol) |
|------|-----------|------------|--------------------------------|----------------------------------------|---------|---------|---------------------------|
| If   | 1         | <i>N</i>   | 0.0040                         | 0.0134                                 | 0.0028  | −0.0022 | −2.9                      |
|      |           | <i>NN</i>  | 0.0027                         | 0.0101                                 | 0.0020  | −0.0015 | −2.0                      |
| IIa  | 2         | <i>N</i>   | 0.0026                         | 0.0079                                 | 0.0016  | −0.0012 | −1.6                      |
|      |           | <i>NN</i>  | 0.0017                         | 0.0058                                 | 0.0011  | −0.0008 | −1.0                      |
|      | 3         | <i>N</i>   | 0.0047                         | 0.0124                                 | 0.0027  | −0.0023 | −3.0                      |
|      |           | <i>NN</i>  | 0.0031                         | 0.0091                                 | 0.0019  | −0.0015 | −2.0                      |
|      | 4         | <i>N</i>   | 0.0035                         | 0.0099                                 | 0.0021  | −0.0017 | −2.3                      |
|      |           | <i>NN</i>  | 0.0023                         | 0.0072                                 | 0.0015  | −0.0011 | −1.5                      |
|      | 5         | <i>N</i>   | 0.0025                         | 0.0075                                 | 0.0015  | −0.0011 | −1.5                      |
|      |           | <i>NN</i>  | 0.0021                         | 0.0064                                 | 0.0013  | −0.0009 | −1.2                      |
|      | 6         | <i>N</i>   | 0.0044                         | 0.0117                                 | 0.0025  | −0.0022 | −2.8                      |
|      |           | <i>NN</i>  | 0.0030                         | 0.0088                                 | 0.0018  | −0.0015 | −1.9                      |
| 7    | <i>N</i>  | 0.0031     | 0.0086                         | 0.0018                                 | −0.0015 | −1.9    |                           |
|      | <i>NN</i> | 0.0017     | 0.0056                         | 0.0011                                 | −0.0008 | −1.0    |                           |
| 8    | <i>N</i>  | 0.0051     | 0.0150                         | 0.0031                                 | −0.0025 | −3.3    |                           |
|      | <i>NN</i> | 0.0038     | 0.0117                         | 0.0024                                 | −0.0019 | −2.5    |                           |
| 9    | <i>N</i>  | 0.0062     | 0.0196                         | 0.0042                                 | −0.0035 | −4.5    |                           |
|      |           | *          | —                              | —                                      | —       | —       | —                         |
| IIc  | 10        | <i>N</i>   | 0.0037                         | 0.0114                                 | 0.0024  | −0.0019 | −2.5                      |
|      |           | <i>NN</i>  | 0.0025                         | 0.0089                                 | 0.0018  | −0.0014 | −1.8                      |
|      | 11        | <i>N</i>   | 0.0048                         | 0.0139                                 | 0.0030  | −0.0025 | −3.3                      |
|      |           | <i>NN</i>  | 0.0033                         | 0.0103                                 | 0.0022  | −0.0017 | −2.3                      |
|      | 12        | <i>N</i>   | 0.0086                         | 0.0283                                 | 0.0059  | −0.0048 | −6.3                      |
|      |           | <i>NN</i>  | 0.0066                         | 0.0233                                 | 0.0048  | −0.0037 | −4.8                      |
| 13   | <i>N</i>  | 0.0063     | 0.0204                         | 0.0043                                 | −0.0034 | −4.5    |                           |
|      | <i>NN</i> | 0.0047     | 0.0172                         | 0.0035                                 | −0.0027 | −3.5    |                           |
| IIIa | 14        | <i>N</i>   | 0.0060                         | 0.0166                                 | 0.0036  | −0.0030 | −4.0                      |
|      |           | <i>NN</i>  | 0.0037                         | 0.0114                                 | 0.0024  | −0.0019 | −2.5                      |
|      | 15        | <i>N</i>   | 0.0055                         | 0.0153                                 | 0.0033  | −0.0028 | −3.7                      |
|      |           | <i>NN</i>  | 0.0040                         | 0.0122                                 | 0.0026  | −0.0021 | −2.8                      |
|      | 16        | <i>N</i>   | 0.0038                         | 0.0132                                 | 0.0026  | −0.0019 | −2.4                      |
|      |           | <i>NN</i>  | 0.0032                         | 0.0116                                 | 0.0022  | −0.0016 | −2.1                      |
| 17   | <i>N</i>  | 0.0053     | 0.0182                         | 0.0037                                 | −0.0029 | −3.7    |                           |
|      | <i>NN</i> | 0.0041     | 0.0159                         | 0.0031                                 | −0.0023 | −3.0    |                           |
| 18   | <i>N</i>  | 0.0021     | 0.0067                         | 0.0013                                 | −0.0010 | −1.3    |                           |

|             |           |               |        |        |         |         |      |
|-------------|-----------|---------------|--------|--------|---------|---------|------|
|             |           | <i>NN</i>     | 0.0013 | 0.0049 | 0.0009  | -0.0006 | -0.8 |
|             | 19        | <i>N</i><br>* | 0.0019 | 0.0063 | 0.0012  | -0.0009 | -1.2 |
|             |           |               | —      | —      | —       | —       | —    |
| <i>IIIb</i> | 20        | <i>N</i>      | 0.0029 | 0.0093 | 0.0019  | -0.0015 | -1.9 |
|             |           | <i>NN</i>     | 0.0029 | 0.0085 | 0.0018  | -0.0015 | -1.9 |
|             | 21        | <i>N</i>      | 0.0046 | 0.0122 | 0.0027  | -0.0023 | -3.0 |
|             |           | <i>NN</i>     | 0.0007 | 0.0028 | 0.0005  | -0.0003 | -0.4 |
| <i>IIIc</i> | 22        | <i>N</i>      | 0.0074 | 0.0216 | 0.0046  | -0.0038 | -5.0 |
|             |           | <i>NN</i>     | 0.0051 | 0.0156 | 0.0033  | -0.0026 | -3.4 |
|             | 23        | <i>N</i>      | 0.0041 | 0.0135 | 0.0027  | -0.0021 | -2.8 |
|             |           | <i>NN</i>     | 0.0032 | 0.0113 | 0.0022  | -0.0017 | -2.2 |
|             | 24        | <i>N</i>      | 0.0036 | 0.0117 | 0.0024  | -0.0019 | -2.5 |
|             |           | <i>NN</i>     | 0.0027 | 0.0097 | 0.0019  | -0.0015 | -1.9 |
|             | 25        | <i>N</i>      | 0.0042 | 0.0137 | 0.0028  | -0.0022 | -2.8 |
|             |           | <i>NN</i>     | 0.0032 | 0.0115 | 0.0023  | -0.0017 | -2.2 |
|             | 26        | <i>N</i>      | 0.0028 | 0.0094 | 0.0019  | -0.0015 | -1.9 |
|             |           | *             | —      | —      | —       | —       | —    |
| <i>IVa</i>  | 27        | <i>N</i>      | 0.0023 | 0.0076 | 0.0015  | -0.0011 | -1.4 |
|             |           | <i>NN</i>     | 0.0018 | 0.0061 | 0.0012  | -0.0008 | -1.1 |
|             | 28        | <i>N</i>      | 0.0051 | 0.0137 | 0.0030  | -0.0026 | -3.4 |
|             |           | <i>NN</i>     | 0.0036 | 0.0105 | 0.0022  | -0.0019 | -2.5 |
|             | 29        | <i>N</i>      | 0.0056 | 0.0185 | 0.0037  | -0.0027 | -3.6 |
|             |           | <i>NN</i>     | 0.0039 | 0.0140 | 0.0028  | -0.0020 | -2.6 |
|             | 30        | <i>N</i>      | 0.0029 | 0.0089 | 0.0018  | -0.0014 | -1.8 |
|             |           | <i>NN</i>     | 0.0021 | 0.0071 | 0.0014  | -0.0010 | -1.3 |
|             | 31        | <i>N</i>      | 0.0053 | 0.0178 | 0.0036  | -0.0028 | -3.7 |
|             |           | <i>NN</i>     | 0.0044 | 0.0150 | 0.0030  | -0.0023 | -3.0 |
|             | 32        | <i>N</i>      | 0.0029 | 0.0089 | 0.0018  | -0.0014 | -1.9 |
|             |           | <i>NN</i>     | 0.0021 | 0.0071 | 0.0014  | -0.0010 | -1.4 |
|             | 33        | <i>N</i>      | 0.0055 | 0.0157 | 0.0033  | -0.0027 | -3.6 |
|             |           | <i>NN</i>     | 0.0041 | 0.0126 | 0.0026  | -0.0021 | -2.7 |
| 34          | <i>N</i>  | 0.0030        | 0.0087 | 0.0018 | -0.0014 | -1.8    |      |
|             | <i>NN</i> | 0.0022        | 0.0071 | 0.0014 | -0.0010 | -1.3    |      |

\* The interaction is absent in the QTAIM diagram, in the case of using non-normalized (original X-ray structure) as the input file.

**Table S17** Topological parameters and estimated energies ( $E_{\text{Esp}}$ ) for dihydrogen interactions in the different pairs of structures I–IV with normalized hydrogen atoms position at the basis set 6-311++G(d,p). The codes indicate the interactions shown in Fig. S8.

| pair | code | $\rho(r)$ ( $e/\text{\AA}^3$ ) | $\nabla^2\rho(r)$ ( $e/\text{\AA}^5$ ) | $G(r)$ | $V(r)$  | $E_{\text{Esp}}$ (kJ/mol) |
|------|------|--------------------------------|----------------------------------------|--------|---------|---------------------------|
| If   | 1    | 0.0041                         | 0.0133                                 | 0.0028 | -0.0022 | -2.9                      |
|      | 2    | 0.0026                         | 0.0079                                 | 0.0016 | -0.0012 | -1.6                      |
|      | 3    | 0.0047                         | 0.0126                                 | 0.0027 | -0.0023 | -3.0                      |
| IIa  | 4    | 0.0035                         | 0.0100                                 | 0.0021 | -0.0017 | -2.2                      |
|      | 5    | 0.0025                         | 0.0075                                 | 0.0015 | -0.0011 | -1.5                      |
|      | 6    | 0.0043                         | 0.0118                                 | 0.0025 | -0.0021 | -2.8                      |
|      | 7    | 0.0031                         | 0.0087                                 | 0.0018 | -0.0014 | -1.9                      |
|      | 8    | 0.0051                         | 0.0150                                 | 0.0031 | -0.0025 | -3.3                      |
|      | 9    | 0.0061                         | 0.0195                                 | 0.0041 | -0.0034 | -4.5                      |
| IIc  | 10   | 0.0036                         | 0.0115                                 | 0.0024 | -0.0019 | -2.5                      |
|      | 11   | 0.0048                         | 0.0139                                 | 0.0030 | -0.0025 | -3.3                      |
|      | 12   | 0.0086                         | 0.0283                                 | 0.0059 | -0.0048 | -6.3                      |
|      | 13   | 0.0063                         | 0.0204                                 | 0.0043 | -0.0035 | -4.5                      |
| IIIa | 14   | 0.0060                         | 0.0166                                 | 0.0036 | -0.0030 | -4.0                      |
|      | 15   | 0.0055                         | 0.0153                                 | 0.0033 | -0.0028 | -3.6                      |
|      | 16   | 0.0038                         | 0.0132                                 | 0.0026 | -0.0019 | -2.5                      |
|      | 17   | 0.0053                         | 0.0181                                 | 0.0037 | -0.0029 | -3.8                      |
|      | 18   | 0.0020                         | 0.0067                                 | 0.0013 | -0.0010 | -1.3                      |
|      | 19   | 0.0018                         | 0.0063                                 | 0.0012 | -0.0009 | -1.1                      |
| IIIb | 20   | 0.0029                         | 0.0092                                 | 0.0019 | -0.0014 | -1.8                      |
|      | 21   | 0.0011                         | 0.0041                                 | 0.0008 | -0.0005 | -0.6                      |
| IIIc | 22   | 0.0075                         | 0.0215                                 | 0.0046 | -0.0038 | -5.0                      |
|      | 23   | 0.0041                         | 0.0136                                 | 0.0027 | -0.0021 | -2.8                      |
|      | 24   | 0.0036                         | 0.0117                                 | 0.0024 | -0.0019 | -2.5                      |
|      | 25   | 0.0042                         | 0.0138                                 | 0.0028 | -0.0022 | -2.8                      |
|      | 26   | 0.0028                         | 0.0094                                 | 0.0019 | -0.0014 | -1.9                      |
|      | 27   | 0.0024                         | 0.0076                                 | 0.0015 | -0.0011 | -1.4                      |
| IVa  | 28   | 0.0051                         | 0.0138                                 | 0.0030 | -0.0026 | -3.4                      |
|      | 29   | 0.0056                         | 0.0186                                 | 0.0037 | -0.0028 | -3.6                      |
|      | 30   | 0.0029                         | 0.0089                                 | 0.0018 | -0.0014 | -1.8                      |
|      | 31   | 0.0053                         | 0.0178                                 | 0.0036 | -0.0028 | -3.7                      |
|      | 32   | 0.0028                         | 0.0090                                 | 0.0018 | -0.0014 | -1.9                      |
|      | 33   | 0.0056                         | 0.0158                                 | 0.0033 | -0.0027 | -3.6                      |
|      | 34   | 0.0030                         | 0.0087                                 | 0.0018 | -0.0014 | -1.8                      |

**Table S18** Topological parameters and estimated energies ( $E_{\text{Esp}}$ ) for selected interactions in the different pairs of structures I–V (using X-ray structure as input file) at the basis set 6-311G(d,p).

| pair | interaction                  | $\rho(r)$ ( $e/\text{\AA}^3$ ) | $\nabla^2\rho(r)$ ( $e/\text{\AA}^5$ ) | $G(r)$ | $V(r)$  | $E_{\text{Esp}}$ (kJ/mol) |
|------|------------------------------|--------------------------------|----------------------------------------|--------|---------|---------------------------|
| Ia   | NH...N <sup>#</sup>          | 0.0221                         | 0.0890                                 | 0.0191 | -0.0159 | -20.9                     |
|      | CH...O=P <sup>#</sup>        | 0.0082                         | 0.0282                                 | 0.0060 | -0.0050 | -6.6                      |
| Ib   | CH...O <sup>#</sup>          | 0.0063                         | 0.0227                                 | 0.0048 | -0.0040 | -5.2                      |
|      | CH...O <sup>#</sup>          | 0.0019                         | 0.0087                                 | 0.0016 | -0.0011 | -1.4                      |
|      | CH...O <sup>#</sup>          | 0.0031                         | 0.0123                                 | 0.0025 | -0.0019 | -2.6                      |
| Ic   | CH... $\pi$ <sup>#</sup>     | 0.0054                         | 0.0167                                 | 0.0034 | -0.0027 | -3.5                      |
|      | CH...O=P <sup>#</sup>        | 0.0048                         | 0.0176                                 | 0.0037 | -0.0029 | -3.9                      |
|      | CH...O=P <sup>#</sup>        | 0.0055                         | 0.0205                                 | 0.0043 | -0.0034 | -4.5                      |
| Id   | CH...N( $\pi$ ) <sup>#</sup> | 0.0059                         | 0.0180                                 | 0.0039 | -0.0033 | -4.3                      |
|      | $\pi$ ... $\pi$ <sup>#</sup> | 0.0060                         | 0.0157                                 | 0.0033 | -0.0027 | -3.5                      |
| Ie   | CH... $\pi$ <sup>#</sup>     | 0.0062                         | 0.0170                                 | 0.0036 | -0.0030 | -4.0                      |
|      | $\pi$ ... $\pi$              | 0.0045                         | 0.0121                                 | 0.0025 | -0.0019 | -2.5                      |
| If   | CH...O=P <sup>#</sup>        | 0.0068                         | 0.0245                                 | 0.0051 | -0.0041 | -5.4                      |
| IIa  | NH...O=P                     | 0.0147                         | 0.0637                                 | 0.0132 | -0.0106 | -13.9                     |
|      | NH...O=P                     | 0.0180                         | 0.0840                                 | 0.0174 | -0.0139 | -18.2                     |
|      | CH...O                       | 0.0037                         | 0.0136                                 | 0.0028 | -0.0023 | -3.0                      |
|      | CH...O                       | 0.0037                         | 0.0149                                 | 0.0030 | -0.0023 | -3.1                      |
|      | CH...N                       | 0.0030                         | 0.0089                                 | 0.0019 | -0.0015 | -2.0                      |
|      | CH...N                       | 0.0024                         | 0.0073                                 | 0.0015 | -0.0012 | -1.6                      |
|      | CH...Cl                      | 0.0027                         | 0.0084                                 | 0.0017 | -0.0013 | -1.7                      |
|      | CH... $\pi$                  | 0.0033                         | 0.0088                                 | 0.0018 | -0.0015 | -2.0                      |
|      | CH... $\pi$                  | 0.0042                         | 0.0129                                 | 0.0026 | -0.0021 | -2.7                      |
| IIb  | CH... $\pi$ <sup>#</sup>     | 0.0063                         | 0.0176                                 | 0.0038 | -0.0032 | -4.1                      |
|      | CH... $\pi$ <sup>#</sup>     | 0.0039                         | 0.0108                                 | 0.0023 | -0.0018 | -2.4                      |
| IIc  | CH...Cl                      | 0.0021                         | 0.0063                                 | 0.0012 | -0.0009 | -1.1                      |
| IId  | CH...Cl <sup>#</sup>         | 0.0050                         | 0.0174                                 | 0.0035 | -0.0025 | -3.4                      |
|      | CH...Cl <sup>#</sup>         | 0.0060                         | 0.0192                                 | 0.0038 | -0.0029 | -3.8                      |
|      | Cl...O <sup>#</sup>          | 0.0021                         | 0.0073                                 | 0.0014 | -0.0009 | -1.2                      |
|      | CH...O=P <sup>#</sup>        | 0.0039                         | 0.0136                                 | 0.0028 | -0.0023 | -3.0                      |
|      | $\pi$ ... $\pi$ <sup>#</sup> | 0.0054                         | 0.0143                                 | 0.0029 | -0.0023 | -3.0                      |
| IIIa | CH...O=P                     | 0.0115                         | 0.0451                                 | 0.0092 | -0.0071 | -9.3                      |
|      | CH...O=P                     | 0.0087                         | 0.0276                                 | 0.0060 | -0.0051 | -6.6                      |
| IIIb | CH...Cl                      | 0.0031                         | 0.0106                                 | 0.0020 | -0.0013 | -1.8                      |
|      | CH...Cl                      | 0.0033                         | 0.0102                                 | 0.0021 | -0.0016 | -2.1                      |
|      | CH... $\pi$                  | 0.0060                         | 0.0167                                 | 0.0036 | -0.0031 | -4.1                      |
|      | CH... $\pi$                  | 0.0036                         | 0.0103                                 | 0.0021 | -0.0017 | -2.3                      |
|      | CH... $\pi$                  | 0.0043                         | 0.0124                                 | 0.0026 | -0.0021 | -2.8                      |
|      | CH... $\pi$                  | 0.0039                         | 0.0109                                 | 0.0023 | -0.0019 | -2.5                      |
| IIIc | CH...Cl                      | 0.0043                         | 0.0143                                 | 0.0028 | -0.0020 | -2.6                      |
|      | CH...Cl                      | 0.0023                         | 0.0069                                 | 0.0014 | -0.0010 | -1.3                      |

|     |                |        |        |        |         |       |
|-----|----------------|--------|--------|--------|---------|-------|
| IVa | NH...S=P       | 0.0063 | 0.0200 | 0.0041 | -0.0032 | -4.1  |
|     | CH...S=P       | 0.0041 | 0.0125 | 0.0024 | -0.0018 | -2.3  |
|     | CH...S=P       | 0.0046 | 0.0133 | 0.0027 | -0.0021 | -2.7  |
| Va  | NH...N         | 0.0249 | 0.0977 | 0.0216 | -0.0188 | -24.7 |
|     | CH...N         | 0.0069 | 0.0203 | 0.0044 | -0.0037 | -4.9  |
|     | CH...S=P       | 0.0051 | 0.0173 | 0.0034 | -0.0024 | -3.2  |
|     | CH... $\pi$    | 0.0053 | 0.0145 | 0.0031 | -0.0025 | -3.3  |
| Vb  | NH...N         | 0.0176 | 0.0678 | 0.0141 | -0.0113 | -14.8 |
|     | CH...S=P       | 0.0070 | 0.0208 | 0.0042 | -0.0032 | -4.2  |
| Vc  | NH...N         | 0.0288 | 0.1111 | 0.0256 | -0.0235 | -30.8 |
|     | CH...N         | 0.0066 | 0.0197 | 0.0042 | -0.0035 | -4.6  |
|     | CH...N         | 0.0062 | 0.0197 | 0.0042 | -0.0036 | -4.7  |
|     | C( $\pi$ )...N | 0.0045 | 0.0141 | 0.0029 | -0.0023 | -3.1  |

# There are a couple of such interactions in the molecular pair, which one time is reported here.

**Table S19** Topological parameters and estimated energies ( $E_{\text{Esp}}$ ) for selected interactions in the different pairs of structures I–V obtained at the basis set 6-311G(d,p), considering the neutron-normalized structures.

| pair | Hydrogen bonds/contacts      | $\rho(r)$ (e/Å <sup>3</sup> ) | $\nabla^2\rho(r)$ (e/Å <sup>5</sup> ) | $G(r)$ | $V(r)$  | $E_{\text{Esp}}$ (kJ/mol) |
|------|------------------------------|-------------------------------|---------------------------------------|--------|---------|---------------------------|
| Ia   | CH...O=P <sup>#</sup>        | 0.0102                        | 0.0337                                | 0.0074 | -0.0063 | -8.3                      |
|      | NH...N <sup>#</sup>          | 0.0318                        | 0.0969                                | 0.0244 | -0.0246 | -32.3                     |
| Ib   | CH...O <sup>#</sup>          | 0.0084                        | 0.0296                                | 0.0064 | -0.0053 | -7.0                      |
|      | CH...O <sup>#</sup>          | 0.0023                        | 0.0101                                | 0.0019 | -0.0014 | -1.8                      |
|      | CH...O <sup>#</sup>          | 0.0040                        | 0.0143                                | 0.0030 | -0.0024 | -3.2                      |
| Ic   | CH... $\pi$ <sup>#</sup>     | 0.0073                        | 0.0223                                | 0.0046 | -0.0036 | -4.8                      |
|      | CH...O=P <sup>#</sup>        | 0.0055                        | 0.0190                                | 0.0041 | -0.0034 | -4.5                      |
|      | CH...O=P <sup>#</sup>        | 0.0064                        | 0.0223                                | 0.0048 | -0.0040 | -5.2                      |
| Id   | CH...N( $\pi$ ) <sup>#</sup> | 0.0075                        | 0.0232                                | 0.0050 | -0.0042 | -5.5                      |
|      | $\pi$ ... $\pi$ <sup>#</sup> | 0.0060                        | 0.0158                                | 0.0033 | -0.0027 | -3.5                      |
| Ie   | CH... $\pi$ <sup>#</sup>     | 0.0078                        | 0.0217                                | 0.0046 | -0.0038 | -5.0                      |
|      | $\pi$ ... $\pi$              | 0.0046                        | 0.0125                                | 0.0025 | -0.0020 | -2.6                      |
| If   | CH...O=P <sup>#</sup>        | 0.0088                        | 0.0311                                | 0.0066 | -0.0054 | -7.1                      |
| IIa  | NH...O=P                     | 0.0195                        | 0.0799                                | 0.0174 | -0.0148 | -19.4                     |
|      | NH...O=P                     | 0.0242                        | 0.1042                                | 0.0230 | -0.0200 | -26.3                     |
|      | CH...O                       | 0.0044                        | 0.0151                                | 0.0032 | -0.0027 | -3.5                      |



|      |                       |        |        |        |         |       |
|------|-----------------------|--------|--------|--------|---------|-------|
|      | CH...O                | 0.0041 | 0.0158 | 0.0033 | -0.0026 | -3.4  |
|      | CH...N                | 0.0036 | 0.0101 | 0.0022 | -0.0018 | -2.4  |
|      | CH...N                | 0.0032 | 0.0089 | 0.0019 | -0.0016 | -2.1  |
|      | CH...Cl               | 0.0034 | 0.0105 | 0.0021 | -0.0016 | -2.1  |
|      | CH...π                | 0.0043 | 0.0115 | 0.0024 | -0.0019 | -2.6  |
|      | CH...π                | 0.0052 | 0.0155 | 0.0032 | -0.0026 | -3.4  |
|      | CH...π                | 0.0022 | 0.0062 | 0.0012 | -0.0010 | -1.2  |
| IIb  | CH...π <sup>#</sup>   | 0.0076 | 0.0212 | 0.0046 | -0.0039 | -5.1  |
|      | CH...π <sup>#</sup>   | 0.0045 | 0.0121 | 0.0025 | -0.0021 | -2.7  |
| IIc  | CH...Cl               | 0.0026 | 0.0079 | 0.0015 | -0.0011 | -1.4  |
| II d | CH...Cl <sup>#</sup>  | 0.0060 | 0.0204 | 0.0041 | -0.0031 | -4.1  |
|      | CH...Cl <sup>#</sup>  | 0.0072 | 0.0226 | 0.0046 | -0.0035 | -4.6  |
|      | Cl...O <sup>#</sup>   | 0.0022 | 0.0074 | 0.0014 | -0.0009 | -1.2  |
|      | CH...O=P <sup>#</sup> | 0.0050 | 0.0163 | 0.0035 | -0.0029 | -3.8  |
|      | π...π <sup>#</sup>    | 0.0055 | 0.0146 | 0.0030 | -0.0024 | -3.1  |
| IIIa | CH...O=P              | 0.0147 | 0.0576 | 0.0120 | -0.0097 | -12.7 |
|      | CH...O=P              | 0.0111 | 0.0350 | 0.0078 | -0.0068 | -8.9  |
| IIIb | CH...Cl               | 0.0035 | 0.0115 | 0.0022 | -0.0015 | -2.0  |
|      | CH...Cl               | 0.0039 | 0.0121 | 0.0025 | -0.0020 | -2.6  |
|      | CH...π                | 0.0074 | 0.0207 | 0.0045 | -0.0038 | -5.0  |
|      | CH...π                | 0.0042 | 0.0113 | 0.0024 | -0.0019 | -2.6  |
|      | CH...π                | 0.0053 | 0.0149 | 0.0031 | -0.0026 | -3.4  |
|      | CH...π                | 0.0051 | 0.0140 | 0.0030 | -0.0025 | -3.2  |
| IIIc | CH...Cl               | 0.0031 | 0.0089 | 0.0018 | -0.0013 | -1.7  |
|      | CH...Cl               | 0.0074 | 0.0216 | 0.0046 | -0.0038 | -5.0  |
|      | CH...π                | 0.0036 | 0.0102 | 0.0021 | -0.0016 | -2.1  |
| IVa  | NH...S=P              | 0.0079 | 0.0236 | 0.0049 | -0.0039 | -5.2  |
|      | CH...S=P              | 0.0045 | 0.0133 | 0.0027 | -0.0020 | -2.6  |
|      | CH...S=P              | 0.0054 | 0.0153 | 0.0032 | -0.0025 | -3.3  |
| Va   | NH...N                | 0.0329 | 0.1039 | 0.0262 | -0.0264 | -34.6 |
|      | CH...N                | 0.0085 | 0.0247 | 0.0054 | -0.0046 | -6.1  |
|      | CH...S=P              | 0.0058 | 0.0185 | 0.0037 | -0.0027 | -3.6  |
|      | CH...π                | 0.0065 | 0.0175 | 0.0037 | -0.0030 | -4.0  |
|      | CH...π                | 0.0070 | 0.0227 | 0.0046 | -0.0036 | -4.7  |

|    |                |        |        |        |         |       |
|----|----------------|--------|--------|--------|---------|-------|
| Vb | NH...N         | 0.0231 | 0.0780 | 0.0175 | -0.0155 | -20.4 |
|    | CH...S=P       | 0.0085 | 0.0242 | 0.0050 | -0.0039 | -5.2  |
| Vc | NH...N         | 0.0388 | 0.1124 | 0.0308 | -0.0336 | -44.1 |
|    | CH...N         | 0.0045 | 0.0150 | 0.0032 | -0.0026 | -3.4  |
|    | CH...N         | 0.0082 | 0.0237 | 0.0051 | -0.0043 | -5.6  |
|    | C( $\pi$ )...N | 0.0046 | 0.0147 | 0.0031 | -0.0024 | -3.2  |

# There are a couple of such interactions in the molecular pair, which one time is reported here.

**Table S20** The interaction energies for the different molecular pairs in the structure EVOSUE (energy values are in kJ/mole).  $R$  is the distance between molecular centroids ( $\text{\AA}$ ).

| $N$                | Symmetry operations | $R$   | $E_{\text{ele}}$ | $E_{\text{pol}}$ | $E_{\text{dis}}$ | $E_{\text{rep}}$ | $E_{\text{tot}}$ |
|--------------------|---------------------|-------|------------------|------------------|------------------|------------------|------------------|
| 2                  | $x, y, z$           | 11.29 | -2.1             | -0.2             | -23.7            | 11.3             | -16.1            |
| 2                  | $x+1/2, -y+1/2, z$  | 11.87 | -0.2             | -0.1             | -7               | 1.4              | -5.5             |
| 2                  | $-x+1/2, y+1/2, -z$ | 9.70  | -2.6             | -0.6             | -26.7            | 14.1             | -17.8            |
| 2                  | $x+1/2, -y+1/2, z$  | 13.19 | -0.1             | -0.1             | -8.7             | 0                | -7.7             |
| 2                  | $-x+1/2, y+1/2, -z$ | 14.42 | 0.5              | 0                | -7.1             | 0                | -5.6             |
| 2                  | $x+1/2, -y+1/2, z$  | 5.47  | -65.8            | -22.8            | -68              | 72.9             | -100.6           |
| 1                  | $-x, -y, -z$        | 7.84  | -4.2             | -1.2             | -35.8            | 18.4             | -25.1            |
| 1                  | $-x, -y, -z$        | 8.38  | -8.9             | -6.4             | -43.3            | 25.8             | -35.9            |
| 1                  | $-x, -y, -z$        | 14.81 | -1               | 0                | -3.5             | 0                | -4.2             |
| 1                  | $-x, -y, -z$        | 14.16 | -0.9             | 0                | -1.9             | 0                | -2.7             |
| $\sum_{2}^{1} E.N$ |                     |       | <b>-77.8</b>     | <b>-27.6</b>     | <b>-183.5</b>    | <b>121.8</b>     | <b>-187.3</b>    |

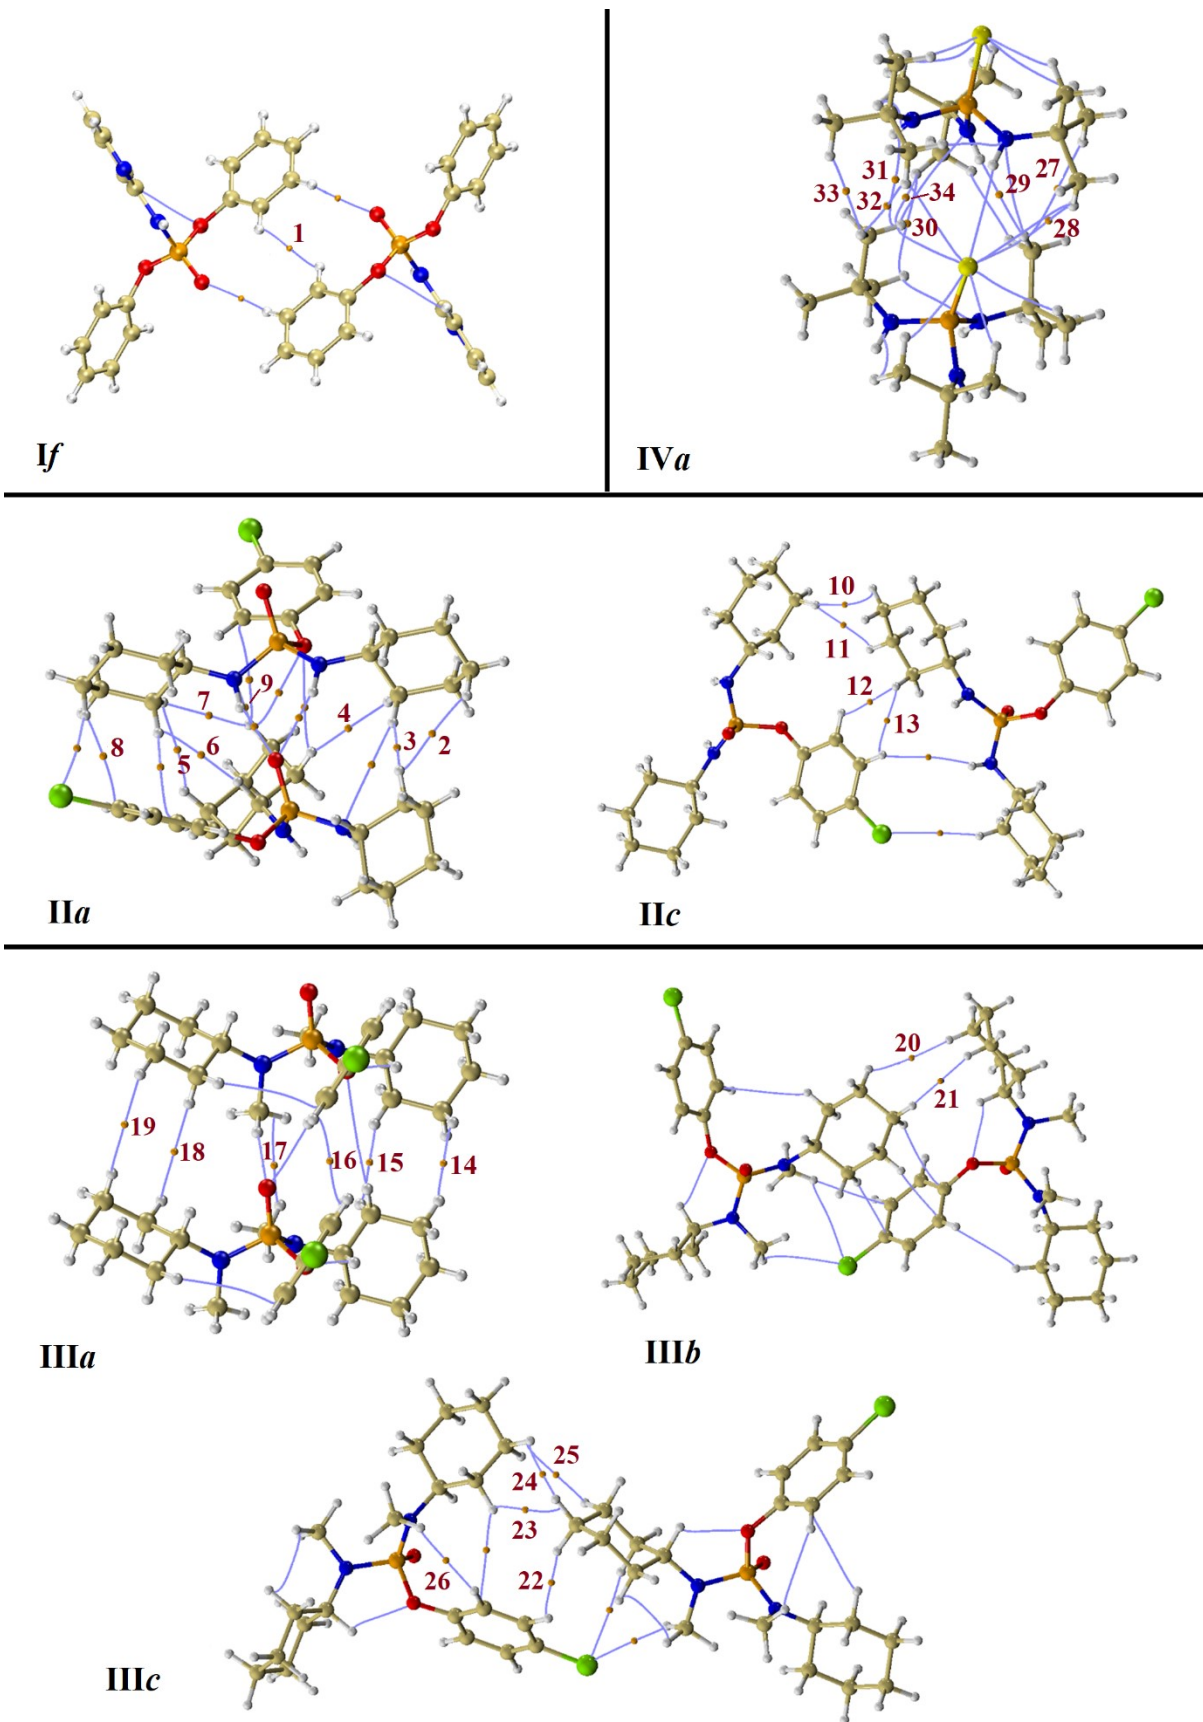

**Fig. S8** QAIM plots of the pairs having H...H interactions, which are encoded with numbers.

**Table S21** The interaction energies for the different molecular pairs in the structure KESZIR (energy values are in kJ/mole).  $R$  is the distance between molecular centroids (Å).

| $N$                        | Symmetry operations | $R$  | $E_{\text{ele}}$ | $E_{\text{pol}}$ | $E_{\text{dis}}$ | $E_{\text{rep}}$ | $E_{\text{tot}}$ |
|----------------------------|---------------------|------|------------------|------------------|------------------|------------------|------------------|
| <b>Molecule 1:</b>         |                     |      |                  |                  |                  |                  |                  |
| 1                          | –                   | 8.34 | 1.7              | –0.8             | –12.8            | 5.7              | –6.4             |
| 1                          | –                   | 8.02 | –12.1            | –5.3             | –16.2            | 17.4             | –20.1            |
| 1                          | –                   | 7.83 | –15.7            | –6.1             | –16.3            | 22.3             | –21.5            |
| 1                          | –                   | 9.56 | 2.9              | –0.2             | –2.7             | 0                | 0.5              |
| 1                          | –                   | 8.64 | –2.7             | –0.6             | –10.4            | 6.1              | –8.5             |
| 1                          | –                   | 6.73 | –20.9            | –6.7             | –31.8            | 21.5             | –41.4            |
| 1                          | –                   | 8.34 | –1.1             | –0.4             | –21.4            | 10               | –13.9            |
| 1                          | –                   | 8.05 | –0.2             | –0.8             | –15.8            | 7.3              | –10.2            |
| 1                          | $-x, -y, -z$        | 9.01 | –1.9             | –0.3             | –5               | 1.1              | –6               |
| 2                          | $-x, y+1/2, -z+1/2$ | 7.37 | –1.8             | –1.8             | –23.3            | 9.7              | –17.5            |
| 1                          | $-x, -y, -z$        | 8.39 | –7.6             | –3.1             | –8.4             | 3.5              | –15.5            |
| 2                          | $x, -y+1/2, z+1/2$  | 6.93 | –12.5            | –5.2             | –35.5            | 23.3             | –33.6            |
| $E_1 = \sum_2^1 E \cdot N$ |                     |      | –43.1            | –19.15           | –129.2           | 80.45            | –122.6           |
| <b>Molecule 2:</b>         |                     |      |                  |                  |                  |                  |                  |
| 1                          | –                   | 8.34 | 1.7              | –0.8             | –12.8            | 5.7              | –6.4             |
| 1                          | $-x, -y, -z$        | 7.63 | 0.4              | –1               | –21.4            | 9.5              | –13.1            |
| 1                          | –                   | 8.02 | –12.1            | –5.3             | –16.2            | 17.4             | –20.1            |
| 1                          | –                   | 7.83 | –15.7            | –6.1             | –16.3            | 22.3             | –21.5            |
| 1                          | $-x, -y, -z$        | 6.55 | –18.3            | –8.5             | –33.3            | 22.6             | –40.7            |

|                                            |                     |      |              |                |                 |               |                 |
|--------------------------------------------|---------------------|------|--------------|----------------|-----------------|---------------|-----------------|
| 2                                          | $-x, y+1/2, -z+1/2$ | 7.18 | -3.6         | -2.5           | -24.4           | 10.3          | -20.6           |
| 1                                          | -                   | 9.56 | 2.9          | -0.2           | -2.7            | 0             | 0.5             |
| 1                                          | -                   | 8.64 | -2.7         | -0.6           | -10.4           | 6.1           | -8.5            |
| 2                                          | $x, -y+1/2, z+1/2$  | 9.03 | 0.7          | -0.5           | -7.3            | 2.5           | -4.3            |
| 1                                          | -                   | 6.73 | -20.9        | -6.7           | -31.8           | 21.5          | -41.4           |
| 1                                          | -                   | 8.34 | -1.1         | -0.4           | -21.4           | 10            | -13.9           |
| 1                                          | -                   | 8.05 | -0.2         | -0.8           | -15.8           | 7.3           | -10.2           |
| $E_2 = \sum_2^1 E \cdot N$                 |                     |      | <b>-35.9</b> | <b>-18.2</b>   | <b>-122.75</b>  | <b>74</b>     | <b>-112.55</b>  |
| $E_{\text{average}} = \frac{E_1 + E_2}{2}$ |                     |      | <b>-39.5</b> | <b>-18.675</b> | <b>-125.975</b> | <b>77.225</b> | <b>-117.575</b> |

**Table S22** The interaction energies for the different molecular pairs in the structure BOFHIQ (energy values are in kJ/mole).  $R$  is the distance between molecular centroids (Å).

| $N$                  | Symmetry operations | $R$   | $E_{\text{ele}}$ | $E_{\text{pol}}$ | $E_{\text{dis}}$ | $E_{\text{rep}}$ | $E_{\text{tot}}$ |
|----------------------|---------------------|-------|------------------|------------------|------------------|------------------|------------------|
| 1                    | $-x, -y, -z$        | 8.51  | -4.8             | -0.4             | -33.1            | 19.7             | -22              |
| 2                    | $x, y, z$           | 9.28  | -2.2             | -1.3             | -16.3            | 9.1              | -11.9            |
| 2                    | $-x, y+1/2, -z+1/2$ | 10.62 | -0.1             | -0.1             | -7.5             | 1.4              | -5.8             |
| 2                    | $x, -y+1/2, z+1/2$  | 10.33 | -0.8             | -0.2             | -12.3            | 5.7              | -8.1             |
| 1                    | $-x, -y, -z$        | 7.81  | -11.9            | -5.9             | -36.4            | 22.7             | -34.6            |
| 2                    | $-x, y+1/2, -z+1/2$ | 7.97  | -8.3             | -3               | -32.8            | 21.1             | -26.5            |
| 1                    | $-x, -y, -z$        | 7.12  | -6.5             | -0.6             | -54.8            | 33.4             | -34.4            |
| 2                    | $x, -y+1/2, z+1/2$  | 7.64  | -11              | -5               | -27.7            | 23.8             | -24.7            |
| 1                    | $-x, -y, -z$        | 11.66 | -1.9             | -0.1             | -11.7            | 6.3              | -8.3             |
| $\sum_2^1 E \cdot N$ |                     |       | <b>-34.95</b>    | <b>-13.1</b>     | <b>-164.6</b>    | <b>102.15</b>    | <b>-126.65</b>   |

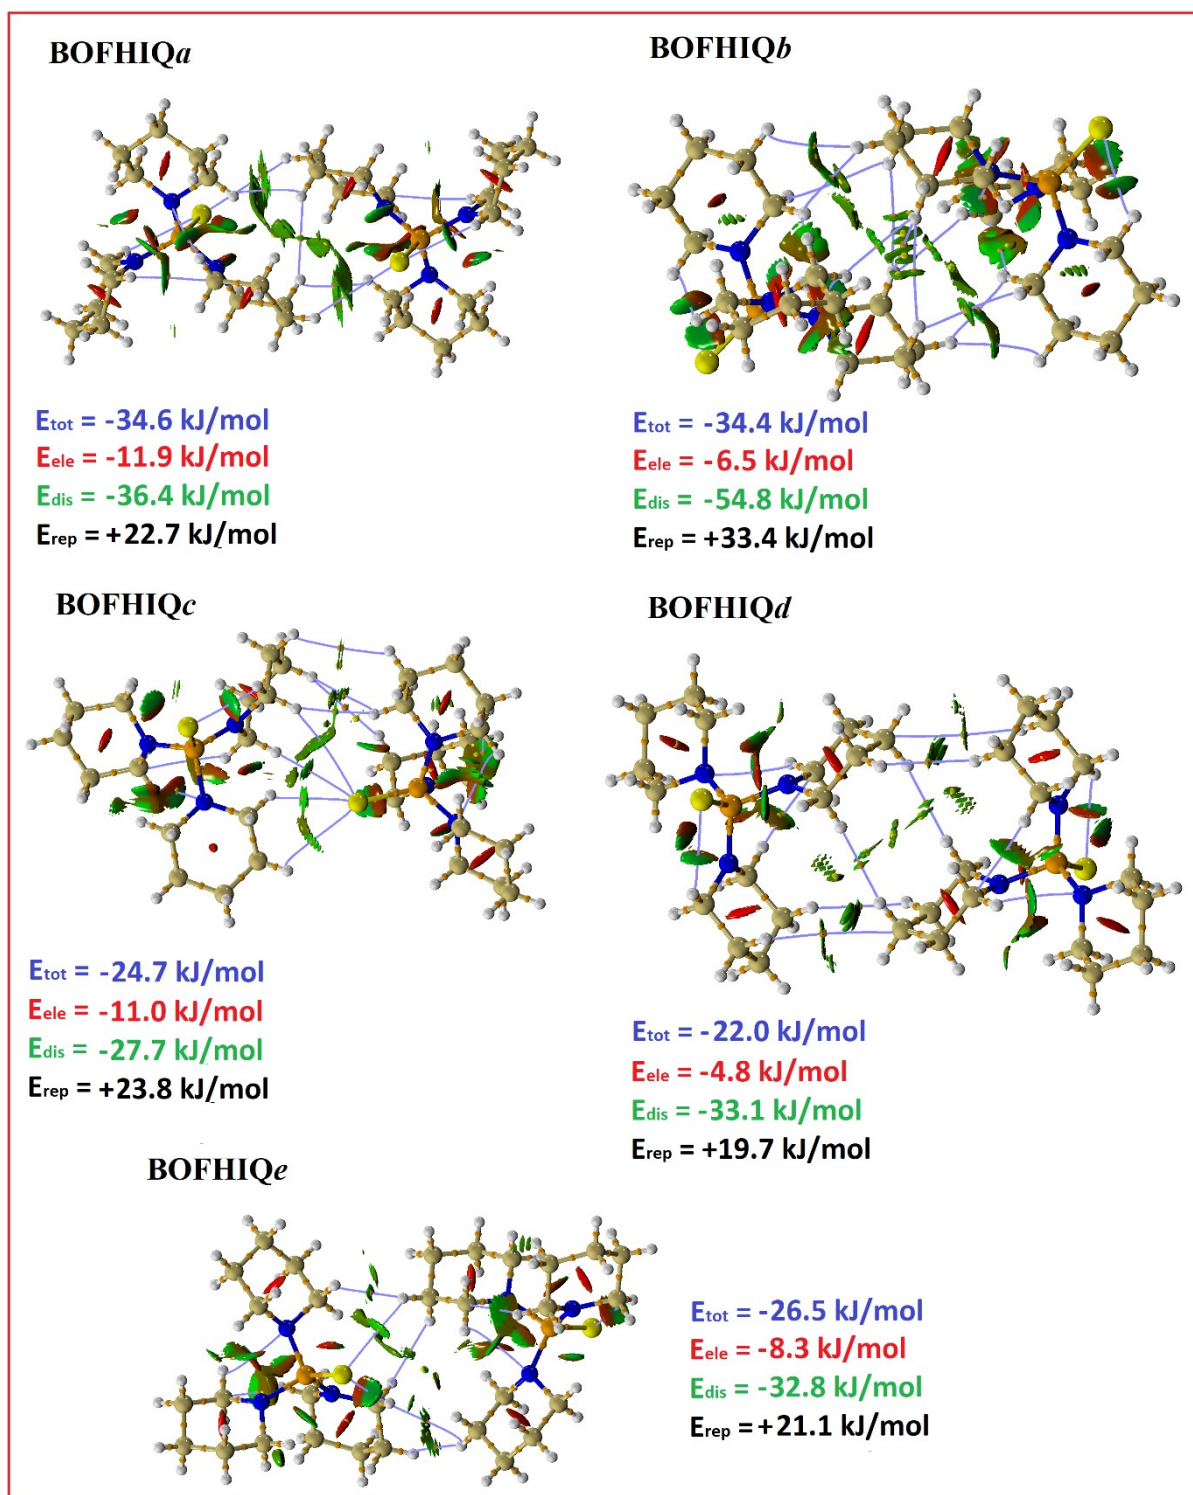

**Fig. S9** The combined QTAIM/NCI plots of the selected molecular pairs ( $E_{\text{tot}} < -20 \text{ kJ/mol}$ ) of the structure BOFHIQ (atom color codes: P = orange, S = yellow, N = blue, C = light beige, H = white).

**Table S23** The scale factors of energy components.

| $k_{\text{ele}}$ | $k_{\text{pol}}$ | $k_{\text{dis}}$ | $k_{\text{rep}}$ |
|------------------|------------------|------------------|------------------|
| 1.057            | 0.740            | 0.871            | 0.618            |
